# Supplementary material for: Accumulated photogenerated holes in type-II ZnSe/CdS nanotetrapods for efficient photocatalytic hydrogen evolution
Source: Royal Society of Chemistry journal article supplement (doi:10.1039/d4ta05550k), 2024-01-01
Supplement: d4ta05550k1.pdf [file d4ta05550k1.pdf]

## Supplementary Information

### **Accumulated photogenerated holes in Type-II ZnSe/CdS nanotetrapods for efficient photocatalytic hydrogen evolution**

*Zhi-Kai Qin<sup>#</sup>, Li-Lei Shen<sup>#</sup>, Shuo Yan, Jingui Wang, and Yu-Ji Gao\**

School of Chemistry and Chemical Engineering, Faculty of Chemistry and Pharmacy,  
Qilu University of Technology (Shandong Academy of Science), Jinan, Shandong  
250353, P. R. China

\*Corresponding authors. Email address: [yjgao@qlu.edu.cn](mailto:yjgao@qlu.edu.cn) (Y.-J. Gao).

## Characterization

Powder X-ray diffraction (XRD) patterns were obtained by using Bruker D8-ADVANCE (Bruker Corp, Billerica, MA, USA) with Cu-K $\alpha$  radiation. X-ray photoelectron spectroscopy (XPS) were recorded on an ESCALAB 250 spectrophotometer (Thermo Fisher Scientific Corp, Waltham, MA, USA) with Al-K $\alpha$  radiation. The binding energy scale was calibrated using the C1s peak at 284.60 eV. Elemental analysis data were obtained from Inductively coupled plasma-mass spectrometry (ICP-MS, 7890A+5975C, Agilent, USA). TEM images were obtained from JEM 2100 (JEOL Co. Ltd., Tokyo, Japan). UV-vis absorption spectra were recorded on a Shimadzu UV-2600PC spectrophotometer (Shimadzu Corp, Kyoto, Japan). Photoluminescence (PL) spectra were obtained by Hitachi (F-4600) spectrophotometer (Hitachi High-Tech Corp., Tokyo, Japan). The content of H<sub>2</sub> in the product was determined by gas chromatography (GC, GC-2014, Shimadzu Corp., Kyoto, Japan), and using Ar as the carrier gas with a molecular sieve column (5 Å; 30 m  $\times$  0.53 mm) and a thermal conductivity detector. The photoelectrochemical measurement was carried out on an electrochemical workstation (CHI 660B, Chinstruments, Shanghai, China). High angle annular dark field (HAADF)-scanning transmission electron microscopy (STEM) images and energy-dispersive X-ray spectroscopy (EDS) maps were acquired using an aberration-corrected JEM-ARM300F (JEOL Co. Ltd., Tokyo, Japan) operated at 80 kV. The steady-state surface photovoltage (SPV) measurement system includes computer, lock-in amplifier, monochromatic light and photovoltaic cell. The monochromatic light was provided by Xe lamp (300 W) and a double-prism monochromator. Femtosecond transient absorption (TA) spectroscopy was measured with pump pulse at 360 nm and probing with white light, the 360 nm pulse was produced by second-harmonic generation of the fundamental output of the Ti:sapphire regenerative amplifier (Coherent Legend Elite, 4 mJ, 25 fs, 1KHz).

### Apparent Quantum Yield (AQY)

The apparent quantum yield (AQY) of ZnSe/CdS NTPs was measured under the monochromatic LED light sources ( $\lambda = 460 \text{ nm}$ ,  $100 \text{ mW cm}^{-2}$ ) with the irradiation area of  $2.0 \times 1.2 \text{ cm}^2$ .  $344.8 \text{ }\mu\text{mol}$  of  $\text{H}_2$  was produced under 1 h irradiation for the ZnSe/CdS NTPs. The AQY was calculated as 20.8 % according to the following equation (S1):

$$AQY = \frac{N_e}{N_p} \times 100\% = \frac{10^9 \times v \times N_A \times K \times h \times c}{I \times A \times \lambda} \times 100\% \quad (S1)$$

Where  $N_e$  is number of reacted electrons;  $N_p$  is number of incident photons;  $v$  is reaction rate ( $\text{mol s}^{-1}$ );  $N_A$  is the Avogadro constant ( $6.022 \times 10^{23} \text{ mol}^{-1}$ );  $K$  is number of electrons transferred ( $K=2$  for photocatalytic  $\text{H}_2$  evolution);  $h$  is the Plank constant ( $6.626 \times 10^{-34} \text{ J s}$ );  $A$  is the irradiation area ( $\text{m}^2$ );  $I$  is the monochromatic light intensity ( $\text{W m}^{-2}$ );  $\lambda$  is the wavelength of the monochromatic light ( $\text{nm}$ );  $c$  is the speed of light ( $3 \times 10^8 \text{ m s}^{-1}$ ).

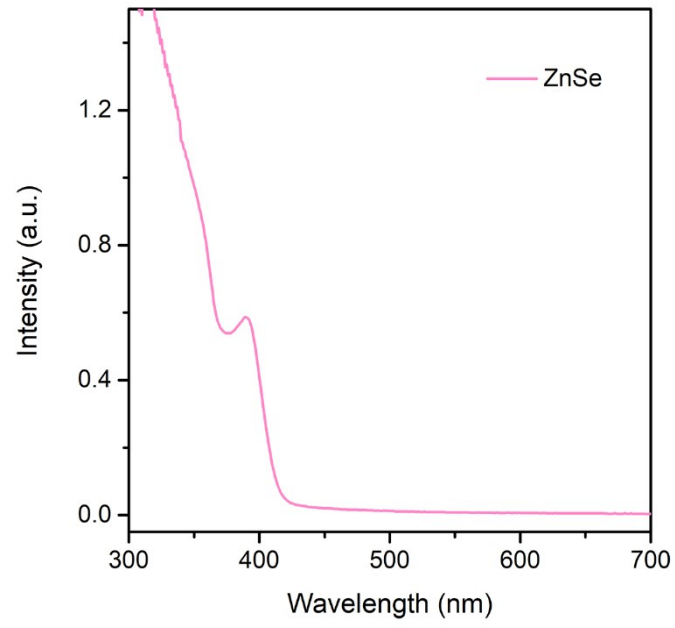

**Fig. S1** The UV-vis absorption spectrum of ZnSe QDs.

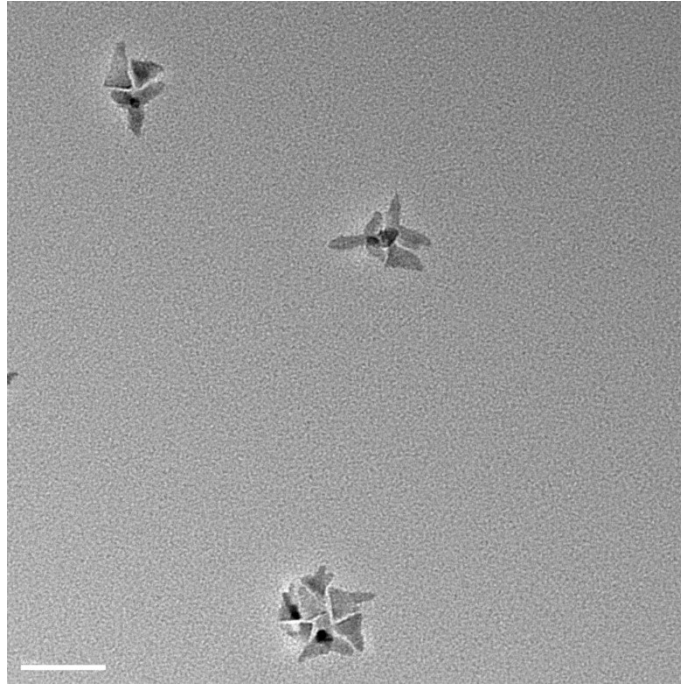

**Fig. S2** The TEM images of thick ZnSe/CdS NTPs. Scale bar: 50 nm.

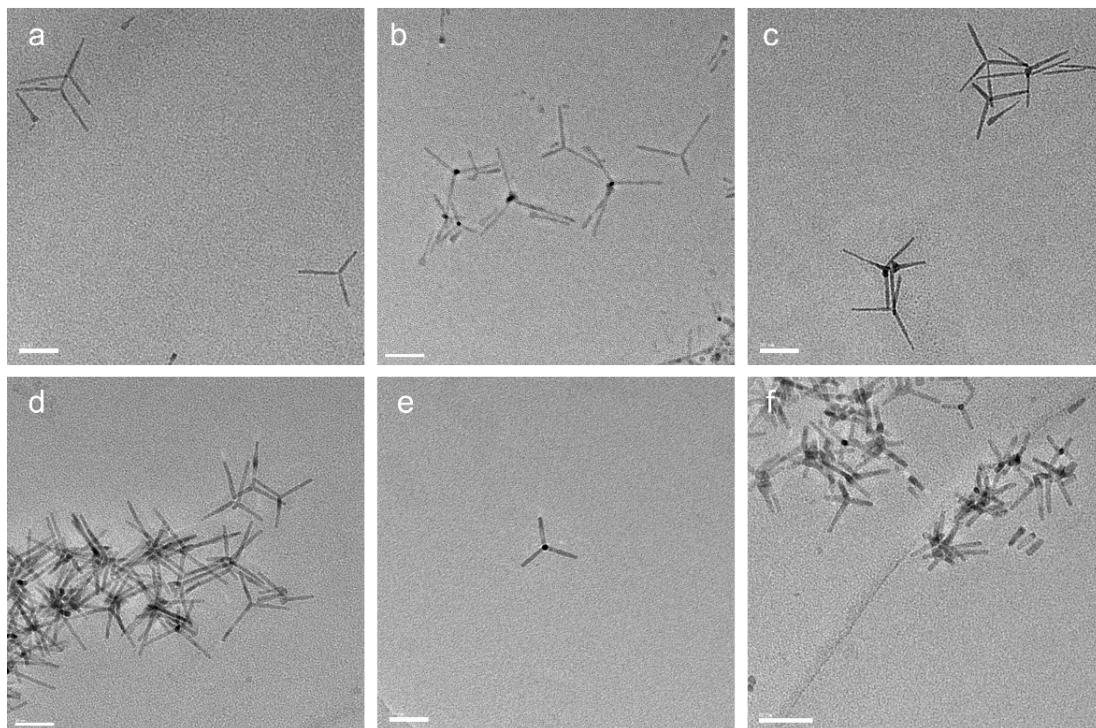

**Fig. S3** The TEM images of (a) CdS NTPs and (b-f) ZnSe<sub>x</sub>/CdS NTPs with different amounts of ZnSe seed during the synthetic process. The amount of ZnSe seed from b to f is  $1.25 \times 10^{-9}$  mol,  $2.5 \times 10^{-9}$  mol,  $5.0 \times 10^{-9}$  mol,  $7.5 \times 10^{-9}$  mol, and  $10.0 \times 10^{-9}$  mol, respectively. Scale bar: 50 nm.

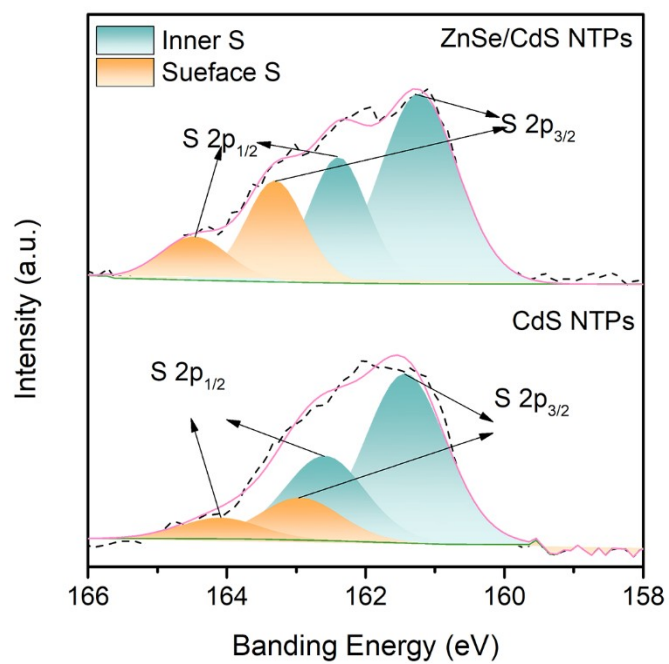

**Fig. S4** High-resolution XPS analysis of S 2p spectra for CdS and ZnSe/CdS NTPs.

**Table S1** Inductively coupled plasma-mass spectrometry (ICP-MS) results of ZnSe/CdS NTPs.

| <b>Elements</b> | <b>Dilution Multiple<sup>[a]</sup></b> | <b>Raw data (mg/L)</b> | <b>Element content (mg/g)</b> | <b>Element content (wt%)</b> |
|-----------------|----------------------------------------|------------------------|-------------------------------|------------------------------|
| Cd              | 50                                     | 7.49                   | 394.0                         | 39.4%                        |
| S               | 50                                     | 2.37                   | 124.4                         | 12.4%                        |
| Se              | 1                                      | 7.28                   | 7.66                          | 0.8%                         |
| Zn              | 1                                      | 2.06                   | 2.17                          | 0.2%                         |

[a]: The solution was diluted by 50 times for the concentration test of Cd and S, while Zn and Se were measured at the original solution.



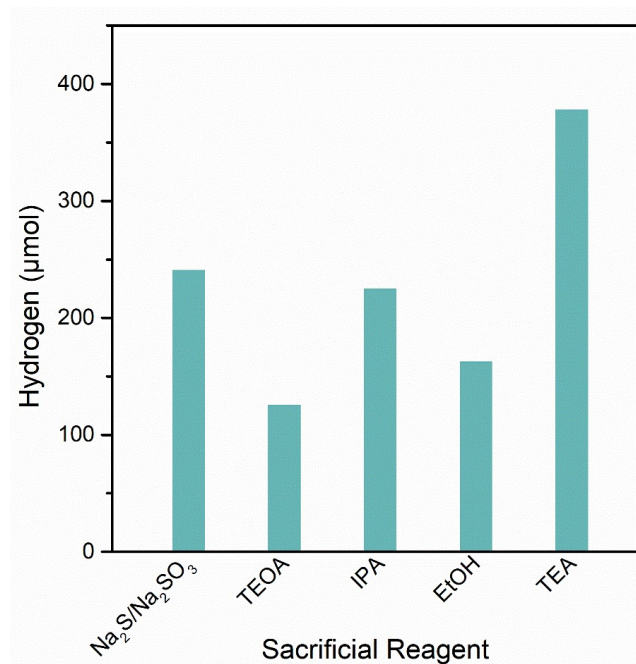

**Fig. S5** Photocatalytic H<sub>2</sub> evolution for ZnSe/CdS NTPs under different sacrificial reagents within 4 h irradiation. The ZnSe/CdS NTPs would produce H<sub>2</sub> efficiently under various sacrificial reagents. While the TEA gives the highest hydrogen production amount. Therefore, TEA serves as the sacrificial reagents throughout the entire reaction process.

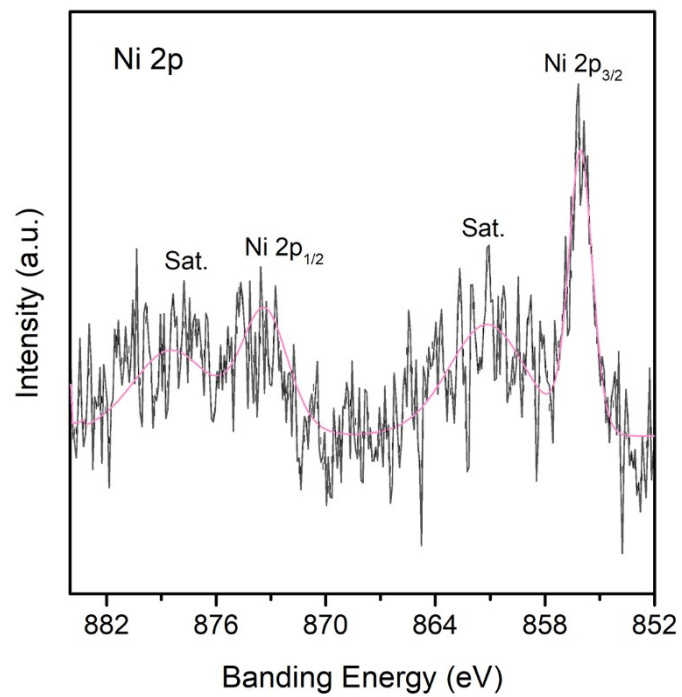

**Fig. S6** High-resolution XPS analysis of Ni 2p spectra for ZnSe/CdS NTPs.

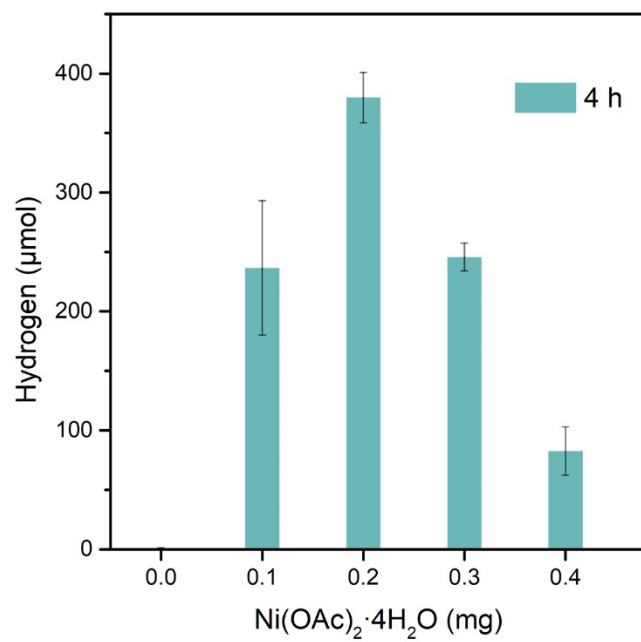

**Fig. S7** Comparison of H<sub>2</sub> evolution for ZnSe/CdS NTPs under different amount of Ni(CH<sub>3</sub>COO)<sub>2</sub>·4·H<sub>2</sub>O. Error bars represent the mean ± s.d. of multiple independent experiments.

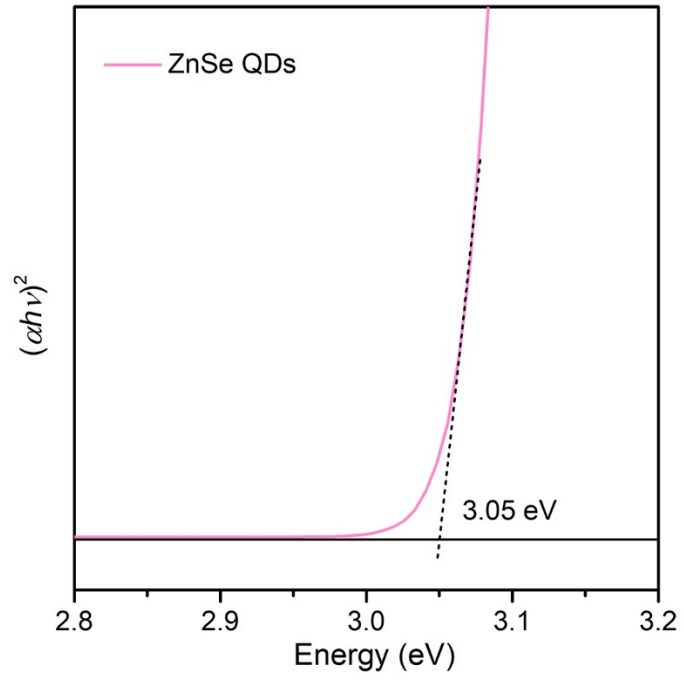

**Fig. S8** Tauc plots of ZnSe QDs.

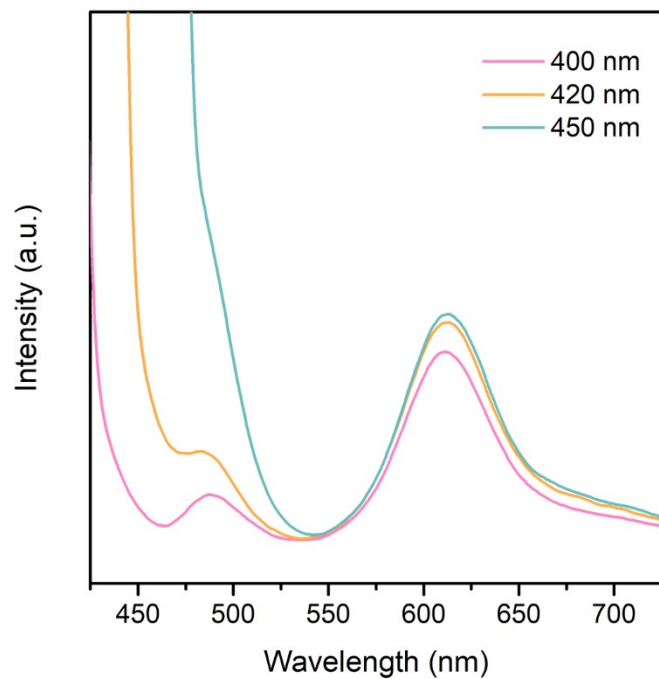

**Fig. S9** Photoluminescence (PL) spectra of ZnSe/CdS NTPs with different excitation wavelength.

**Table S2** Comparison of photocatalytic H<sub>2</sub> evolution with reported colloidal nanocrystals based systems.

| Photocatalyst                                        | Co-catalyst      | Light Source  | Donor                                                 | Rate of H <sub>2</sub> Evolution <sup>[a]</sup><br>( $\mu\text{mol h}^{-1} \text{mg}^{-1}$ ) | TON                | AQY (%) | Time (h) | Refer     |
|------------------------------------------------------|------------------|---------------|-------------------------------------------------------|----------------------------------------------------------------------------------------------|--------------------|---------|----------|-----------|
| Ni-CdS NRs                                           | None             | 447 nm        | EtOH                                                  | 63                                                                                           | None               | 53      | 4        | [1]       |
| CdSe/CdS                                             | None             | >420 nm       | TEOA                                                  | 16.03                                                                                        | None               | None    | 4        | [2]       |
| CdS QDs                                              | Co <sup>2+</sup> | >420 nm       | Na <sub>2</sub> SO <sub>3</sub>                       | ----                                                                                         | 29000              | None    | 88       | [3]       |
| CdS QDs                                              | Ni <sup>2+</sup> | >400 nm       | Glycerol                                              | 74.6                                                                                         | 38405              | None    | 20       | [4]       |
| CdS QDs                                              | Cobaloxime       | >420 nm       | TEOA                                                  | 2.3 <sup>[b]</sup>                                                                           | 171                | None    | 15       | [5]       |
| CdS QDs                                              | None             | >400 nm       | N <sub>2</sub> H <sub>4</sub> ·H <sub>2</sub> O       | 33                                                                                           | 14.16              | None    | 4        | [6]       |
| NiS <sub>2</sub> -C/CdS NSs                          | None             | >420 nm       | Na <sub>2</sub> S and Na <sub>2</sub> SO <sub>3</sub> | 92.19                                                                                        | None               | None    | 5        | [7]       |
| Pt <sub>SA+C</sub> /CdS                              | None             | >420 nm       | Lactic acid                                           | 80.4                                                                                         | 58818              | None    | 6        | [8]       |
| CdS@MoS <sub>2</sub> /Ti <sub>3</sub> C <sub>2</sub> | None             | 420 nm        | Lactic acid                                           | 14.88                                                                                        | None               | None    | 78       | [9]       |
| CdS/ZnS-ReS <sub>2</sub>                             | None             | ≥420 nm       | Na <sub>2</sub> S and Na <sub>2</sub> SO <sub>3</sub> | 10.72                                                                                        | None               | 1.7     | 2        | [10]      |
| CdS/TiO <sub>2</sub>                                 | None             | 300 W Xe lamp | Na <sub>2</sub> S and Na <sub>2</sub> SO <sub>3</sub> | 21.4                                                                                         | None               | None    | 4        | [11]      |
| NiS/CdS NPs                                          | None             | ≥420 nm       | Lactic acid                                           | 7.49                                                                                         | None               | None    | 16       | [12]      |
| CoP QDs/CdS NRs                                      | None             | >400 nm       | Lactic acid                                           | 104.95                                                                                       | None               | 32.16   | 12       | [13]      |
| Co <sub>3</sub> N/CdS                                | None             | >420 nm       | Na <sub>2</sub> S and Na <sub>2</sub> SO <sub>3</sub> | 137.33                                                                                       | None               | 14.9    | 48       | [14]      |
| CdS                                                  | None             | ≥420 nm       | Na <sub>2</sub> S and Na <sub>2</sub> SO <sub>3</sub> | 9.58                                                                                         | None               | 4.12    | 15       | [15]      |
| CdS/Pt/Mo <sub>2</sub> C                             | None             | >400 nm       | Na <sub>2</sub> S and Na <sub>2</sub> SO <sub>3</sub> | 1.83                                                                                         | None               | 9.39    | 20       | [16]      |
| ZnSe/CdS NTPs                                        | Ni <sup>2+</sup> | 460 nm        | TEA                                                   | 142.89                                                                                       | $1.71 \times 10^8$ | 20.8    | 100      | This work |

[a]: All units are converted to  $\mu\text{mol h}^{-1} \text{mg}^{-1}$  according to the results provided in the articles.

[b]: The data is calculated according to the data in the article.

## References

- [1] T. Simon, N. Bouchonville, M. J. Berr, A. Vaneski, A. Adrović, D. Volbers, R. Wyrwich, M. Döblinger, A. S. Susha, A. L. Rogach, F. Jäckel, J. K. Stolarczyk and J. Feldmann, *Nat. Mater.*, 2014, **13**, 1013.
- [2] R. Lv, K. Ye, W. Zhang, H. Chen, R. Zhao, H. Wu and M. Chen, *Colloid Surf. A-Physicochem. Eng. Asp.*, 2024, **684**, 133143.
- [3] C. M. Chang, K. L. Orchard, B. C. M. Martindale and E. Reisner, *J. Mater. Chem. A*, 2016, **4**, 2856.
- [4] J.-J. Wang, Z.-J. Li, X.-B. Li, X.-B. Fan, Q.-Y. Meng, S. Yu, C.-B. Li, J.-X. Li, C.-H. Tung and L.-Z. Wu, *ChemSusChem*, 2014, **7**, 1468.
- [5] F. Wen, J. Yang, X. Zong, B. Ma, D. Wang and C. Li, *J. Catal.*, 2011, **281**, 318.
- [6] M. K. Jana, U. Gupta and C. N. R. Rao, *Dalton Trans.*, 2016, **45**, 15137.
- [7] B. Yu, X. Chen, C. Huang and W. Yao, *Appl. Surf. Sci.*, 2022, **592**, 153259.
- [8] J. Zhang, Y. Pan, D. Feng, L. Cui, S. Zhao, J. Hu, S. Wang and Y. Qin, *Adv. Mater.*, 2023, **35**, 2300902.
- [9] C. Wu, W. Huang, H. Liu, K. Lv and Q. Li, *Appl. Catal. B Environ.*, 2023, **330**, 122653.
- [10] N. Su, Y. Bai, Z. Shi, J. Li, Y. Xu, D. Li, B. Li, L. Ye and Y. He, *ACS Omega*, 2023, **8**, 6059.
- [11] V. Navakoteswara Rao, P. Kedhareswara Sairam, M.-D. Kim, M. Rezakazemi, T. M. Aminabhavi, C. W. Ahn and J.-M. Yang, *Journal of Environmental Management*, 2023, **340**, 117895.
- [12] K. Zhang, Z. Mou, S. Cao, S. Wu, X. Xu and C. Li, *Int. J. Hydrog. Energy*, 2022, **47**, 12605.
- [13] Q. Sun, Z. Yu, R. Jiang, Y. Hou, L. Sun, L. Qian, F. Li, M. Li, Q. Ran and H. Zhang, *Nanoscale*, 2020, **12**, 19203.
- [14] H. Zhen, D. Jiang, Z. Sun, R. Muhammad Irfan, L. Zhang and P. Du, *Catal. Sci. Technol.*, 2017, **7**, 1515.
- [15] S. Cui, R. Ao, Z. Lin and M. Ding, *Int. J. Hydrog. Energy*, 2024, **51**, 848.
- [16] X. Jing, X. Peng, Y. Cao, W. Wang and S. Wang, *RSC Adv.*, 2018, **8**, 33993.
